# Supplementary material for: Prevention of cisplatin-based chemotherapy-induced delayed nausea and vomiting using triple antiemetic regimens: a mixed treatment comparison
Source: PubMed Central journal article supplement (PMC5029710; doi:10.18632/oncotarget.8255), 2016-03-22
Supplement: oncotarget-07-24402-s001.pdf [file oncotarget-07-24402-s001.pdf]

# Prevention of cisplatin-based chemotherapy-induced delayed nausea and vomiting using triple antiemetic regimens: a mixed treatment comparison

## Supplementary Materials

**Supplementary Table S1: Jadad quality scale**

| Study                    | Random sequence generation | Double blind | Incomplete outcome data | Total score |
|--------------------------|----------------------------|--------------|-------------------------|-------------|
| Daniel Campos 2001       | 2                          | 2            | 1                       | 5           |
| H. Saito 2012            | 1                          | 2            | 1                       | 4           |
| P. J. Hesketh 2014       | 1                          | 2            | 1                       | 4           |
| P. J. Hesketh 2003       | 2                          | 2            | 1                       | 5           |
| Sant P. Chawla 2001      | 2                          | 2            | 1                       | 5           |
| Sergio Poli-Bigelli 2003 | 2                          | 2            | 0                       | 4           |
| Steven Grunberg 2011     | 2                          | 2            | 0                       | 4           |
| Toshiaki Takahashi 2010  | 1                          | 2            | 1                       | 4           |
| Zhihuang Hu 2014         | 2                          | 2            | 1                       | 5           |
| Bernardo Rapoport 2015   | 2                          | 2            | 1                       | 5           |

Jadad quality scale: 1–2 total score is for low quality, 3–5 total score is for high quality.

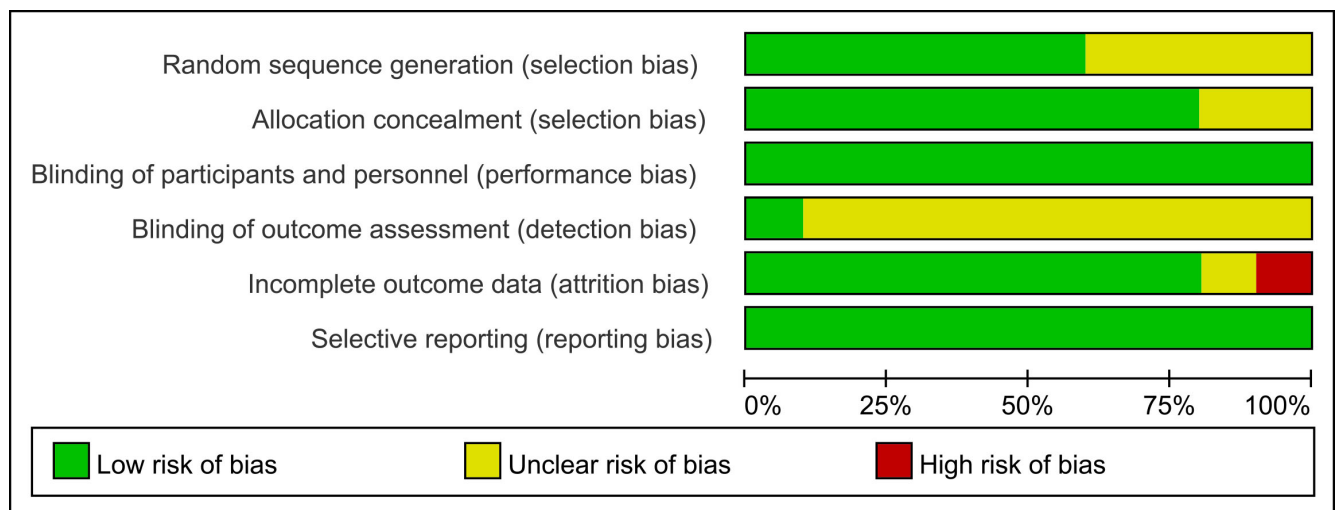

**Supplementary Figure S1: Risk of bias graph: review authors' assessment of each risk of bias item presented as percentages across all included studies.**

|                          | Random sequence generation (selection bias) | Allocation concealment (selection bias) | Blinding of participants and personnel (performance bias) | Blinding of outcome assessment (detection bias) | Incomplete outcome data (attrition bias) | Selective reporting (reporting bias) |
|--------------------------|---------------------------------------------|-----------------------------------------|-----------------------------------------------------------|-------------------------------------------------|------------------------------------------|--------------------------------------|
| Bernardo L Rapoport 2015 | +                                           | +                                       | +                                                         | ?                                               | +                                        | +                                    |
| Daniel Campos 2001       | ?                                           | +                                       | +                                                         | ?                                               | +                                        | +                                    |
| H. Saito 2013            | ?                                           | +                                       | +                                                         | ?                                               | +                                        | +                                    |
| P. J. Hesketh 2003       | +                                           | +                                       | +                                                         | ?                                               | +                                        | +                                    |
| P. J. Hesketh 2014       | ?                                           | ?                                       | +                                                         | ?                                               | +                                        | +                                    |
| Sant P. Chawla 2001      | +                                           | +                                       | +                                                         | ?                                               | +                                        | +                                    |
| Sergio Poli-Bigelli 2003 | +                                           | ?                                       | +                                                         | ?                                               | -                                        | +                                    |
| Steven Grunberg 2011     | +                                           | +                                       | +                                                         | +                                               | ?                                        | +                                    |
| Toshiaki Takahashi 2010  | ?                                           | +                                       | +                                                         | ?                                               | +                                        | +                                    |
| Zhihuang Hu 2014         | +                                           | +                                       | +                                                         | ?                                               | +                                        | +                                    |

Supplementary Figure S2: Risk of bias summary: review authors' assessment of each risk of bias item for each included study.

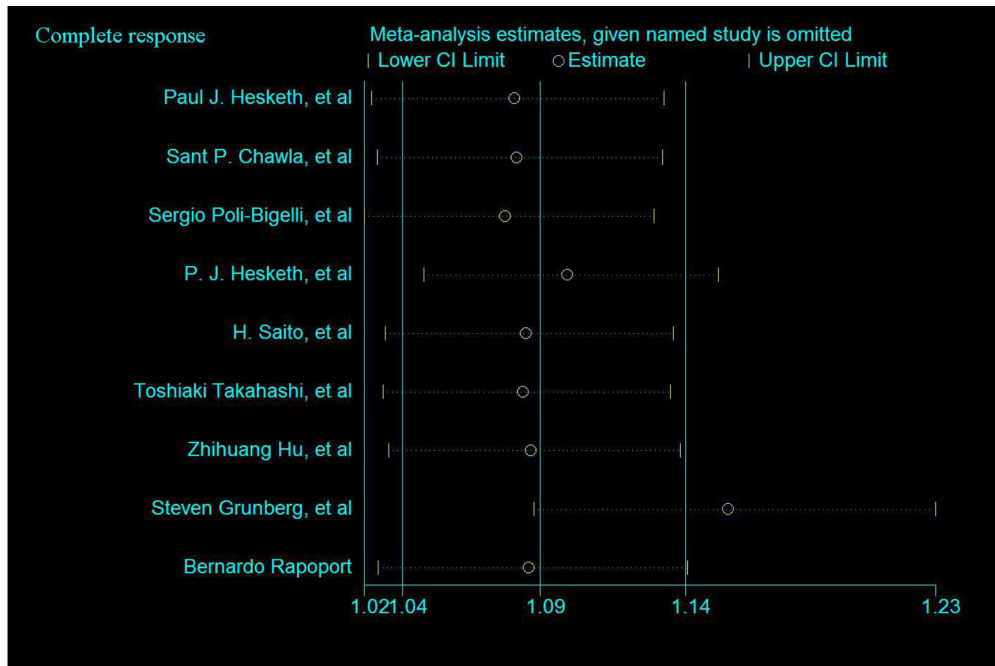

The vertical line at 1.09 represents the total combined effect of a complete response. The two vertical lines on the left and right represent the corresponding upper and lower confidence interval (CI) limits for the total combined effect. The lines corresponding to each study represent the bias caused by the single study.

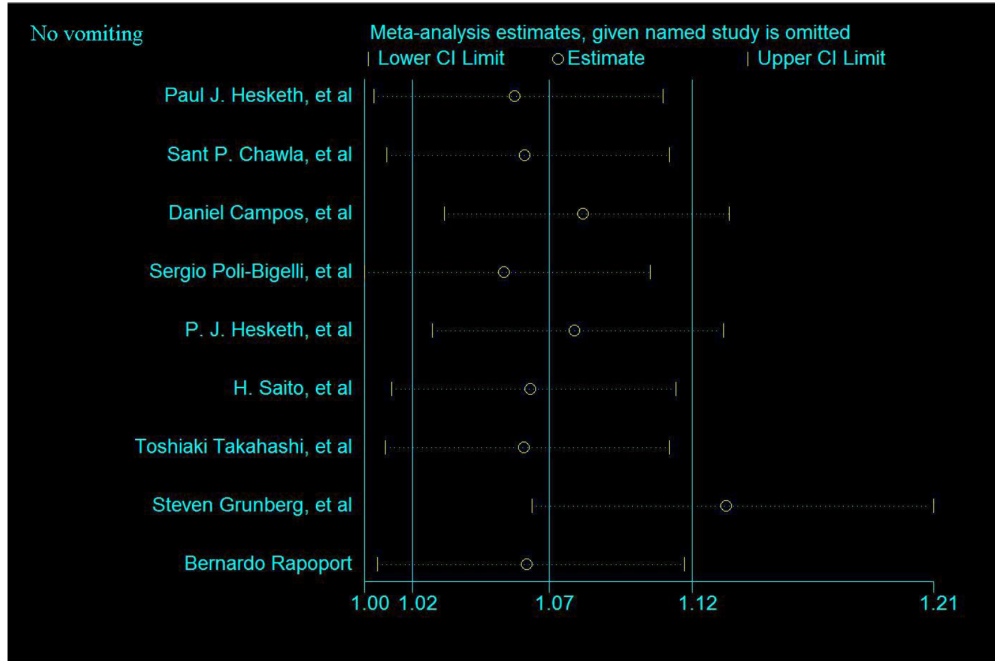

The vertical line at 1.07 represents the total combined effect of no vomiting. The two vertical lines on the left and right represent the corresponding upper and lower confidence interval (CI) limits of the total combined effect. The lines corresponding to each study represent the bias caused by the single study.

**Supplementary Figure S3: Sensitivity analysis on complete response (CR) and no vomiting (NV).**

**Supplementary Table S2: Frequency of adverse events in the included studies**

|                     | <b>Constipation</b> | <b>Hiccups</b> | <b>Asthenia</b> | <b>Anorexia</b> | <b>Diarrhea</b> |
|---------------------|---------------------|----------------|-----------------|-----------------|-----------------|
| Daniel Campos       | 1                   | 1              | 1               | 1               | 1               |
| H. Saito            | 1                   | 1              | 0               | 0               | 0               |
| P. J. Hesketh 2014  | 0                   | 1              | 0               | 1               | 0               |
| P. J. Hesketh 2003  | 1                   | 1              | 1               | 0               | 0               |
| Sant P. Chawla      | 1                   | 1              | 1               | 1               | 1               |
| Sergio Poli Bigelli | 1                   | 0              | 1               | 1               | 1               |
| Steven Grunberg     | 1                   | 1              | 1               | 1               | 1               |
| Toshiaki Takahashi  | 1                   | 1              | 0               | 1               | 1               |
| Zhihuang Hu         | 1                   | 0              | 1               | 0               | 1               |
| Bernardo Rapoport   | 1                   | 1              | 1               | 0               | 0               |
| Total               | 9                   | 8              | 7               | 6               | 6               |

1, the specific adverse event was reported in the study; 0, the specific adverse event was not reported in the study.
